# Supplementary material for: Atopic Dermatitis as a Multifactorial Skin Disorder. Can the Analysis of Pathophysiological Targets Represent the Winning Therapeutic Strategy?
Source: Pharmaceuticals (Basel). 2020 Nov 22;13(11):411. doi: 10.3390/ph13110411 (PMC7700401; doi:10.3390/ph13110411)
Supplement: Supplementary file 1 [file pharmaceuticals-13-00411-s001.pdf]

Table S1. Restoration of healthy skin microbiota. A) Live microorganism

| LIVE MICROORGANISMS | Microorganisms<br>(manipulation methods<br>and/or derivatives) | In vivo, in vitro or<br>ex vivo<br>methodology used | AD Stage or Induction<br>method /<br>Route of administration                                                     | Results                                                                                                                                                                                                                                                                                                           | Conclusion                                                                                                                                 | Ref.  | Year |
|---------------------|----------------------------------------------------------------|-----------------------------------------------------|------------------------------------------------------------------------------------------------------------------|-------------------------------------------------------------------------------------------------------------------------------------------------------------------------------------------------------------------------------------------------------------------------------------------------------------------|--------------------------------------------------------------------------------------------------------------------------------------------|-------|------|
|                     | <i>L.plantarum</i> LM1004                                      | SD rats and ddY mice                                | Histamine-induced vasodilation AD and Contact dermatitis induced by dinitrophenyl-derivatised ovalbumin/<br>Oral | <ul style="list-style-type: none"><li>• Reduced vasodilation, pruritus, oedema, and serum histamine;</li><li>• decreased expression levels of Th2 and Th17 cell transcription factors</li><li>• enhanced transcription of immunomodulation factors (Th1 and Treg cells, galactin-9 and filaggrin).</li></ul>      | The potential for AD treatment was demonstrated by mechanisms that might involve the modulation of host immune systems and gut microbiota. | [129] | 2019 |
|                     | <i>B. lactis</i> CECT 8145                                     | Clinical trial<br>(Children)                        | Moderate/<br>Oral                                                                                                | <ul style="list-style-type: none"><li>• Improvement in SCORAD;</li><li>• reduction in the use of topical steroids.</li></ul>                                                                                                                                                                                      | Reduction of SCORAD index and use of topical steroids in patients with moderate AD.                                                        | [50]  | 2018 |
|                     | <i>B. longum</i> CECT 7347                                     |                                                     |                                                                                                                  |                                                                                                                                                                                                                                                                                                                   |                                                                                                                                            |       |      |
|                     | <i>L.casei</i> CECT 9104                                       |                                                     |                                                                                                                  |                                                                                                                                                                                                                                                                                                                   |                                                                                                                                            |       |      |
|                     | <i>B. longum</i> LA 101                                        | Hairless SKH-1 mice                                 | Chronic skin inflammation induced by 2-O-tetradecanoylphorbol-13-acetate /<br>Oral                               | <ul style="list-style-type: none"><li>• Induced chronic skin inflammation limited;</li><li>• downregulation of pro-inflammatory cytokines (IL-1<math>\beta</math>, IL-6, TNF-<math>\alpha</math>, IL- 17 and IL-22);</li><li>• up-regulated levels of the anti-inflammatory cytokines, IL-10, and IL-4.</li></ul> | Help in preserving skin integrity and homeostasis.                                                                                         | [51]  | 2018 |
|                     | <i>L.helveticus</i> LA 102                                     |                                                     |                                                                                                                  |                                                                                                                                                                                                                                                                                                                   |                                                                                                                                            |       |      |
|                     | <i>L. lactis</i> LA 103,                                       |                                                     |                                                                                                                  |                                                                                                                                                                                                                                                                                                                   |                                                                                                                                            |       |      |
|                     | <i>S. thermophilus</i> LA104                                   |                                                     |                                                                                                                  |                                                                                                                                                                                                                                                                                                                   |                                                                                                                                            |       |      |
|                     | <i>L. rhamnosus</i> LA 801                                     |                                                     |                                                                                                                  |                                                                                                                                                                                                                                                                                                                   |                                                                                                                                            |       |      |

## LIVE MICROORGANISMS

|                                                          |                      |        |                                                            |                                                                                                                                                                                                                                                                                        |                                                                                                                                                                           |      |      |
|----------------------------------------------------------|----------------------|--------|------------------------------------------------------------|----------------------------------------------------------------------------------------------------------------------------------------------------------------------------------------------------------------------------------------------------------------------------------------|---------------------------------------------------------------------------------------------------------------------------------------------------------------------------|------|------|
|                                                          |                      |        |                                                            | <ul style="list-style-type: none"> <li>Reduction in skin lesions, epidermal thickening, and serum immunoglobulin E levels;</li> </ul>                                                                                                                                                  |                                                                                                                                                                           |      |      |
| <i>W. cibaria</i> WIKIM28                                | BALB/c mice          |        | AD-like lesions induced by 2,4-dinitrochlorobenzene / Oral | <ul style="list-style-type: none"> <li>type 2 T cells cytokines decreased;</li> <li>the proportion of CD4<sup>+</sup>CD25<sup>+</sup>Foxp3<sup>+</sup>regulatory T cells in mesenteric lymph nodes and IL-10 levels in polyclonal stimulated MLN cells were both increased.</li> </ul> | Amelioration of AD-like symptoms by suppressing allergic Th2 responses and induction of Treg responses.                                                                   | [52] | 2017 |
| <i>L. paracasei</i><br><i>L. fermentum</i>               | Clinical (children)  | trials | Moderate to severe/<br>Oral                                | <ul style="list-style-type: none"> <li>Improvement in SCORAD</li> </ul>                                                                                                                                                                                                                | Significant clinical improvement.                                                                                                                                         | [53] | 2015 |
| <i>L. salivarius</i> LS01                                | Clinical (children)  | trials | Moderate to severe/<br>Oral                                | <ul style="list-style-type: none"> <li>Improvement in SCORAD</li> </ul>                                                                                                                                                                                                                | Significant clinical improvement.                                                                                                                                         | [54] | 2014 |
| <i>L. salivarius</i> LS01<br><i>S. thermophiles</i> ST10 | Pilot trial (Adults) |        | Moderate to severe/<br>Oral                                | <ul style="list-style-type: none"> <li>Improvement in SCORAD</li> <li>Slight decrease in faecal <i>S. aureus</i> count</li> </ul>                                                                                                                                                      | The potential role of the two bacterial strain for AD treatment was demonstrated, moreover the addition of tara gum improve the overall efficacy of the probiotic strain. | [55] | 2014 |

**Table S1 Restoration of healthy skin microbiota (Continued. B) Heat-killed or inactivated microorganisms**

|                                            |                                                                                                                                                                                                                             |                                                              |                                                                                                  |                                                                                                                                                                                                                                                                                                                              |                                                                                                                                                  |      |      |
|--------------------------------------------|-----------------------------------------------------------------------------------------------------------------------------------------------------------------------------------------------------------------------------|--------------------------------------------------------------|--------------------------------------------------------------------------------------------------|------------------------------------------------------------------------------------------------------------------------------------------------------------------------------------------------------------------------------------------------------------------------------------------------------------------------------|--------------------------------------------------------------------------------------------------------------------------------------------------|------|------|
| HEAT-KILLED OR INACTIVATED MICROORGANISMS1 | <i>L. johnsonii</i> NCC 533<br>(heat-killed)                                                                                                                                                                                | <i>In vitro</i><br>reconstructed<br>human epidermis<br>(RHE) | <i>S. aureus in vitro</i> adhesion to<br>skin and boost cutaneous<br>innate immunity/<br>Topical | <ul style="list-style-type: none"> <li>• Reduction of the binding of radiolabelled <i>S. aureus</i>;</li> <li>• antimicrobial peptide expression induction.</li> </ul>                                                                                                                                                       | An enhanced cutaneous innate immunity and reduced <i>S. aureus</i> colonisation was demonstrated.                                                | [57] | 2018 |
|                                            | <i>L. johnsonii</i> NCC 533<br>(heat-killed)                                                                                                                                                                                | Clinical trial<br>(adult)                                    | Mild-to-moderate/<br>Topical                                                                     | <ul style="list-style-type: none"> <li>• Reduction in <i>S. aureus</i> count;</li> <li>• improvement in SCORAD.</li> </ul>                                                                                                                                                                                                   | The findings support further development of topical treatments containing heat-treated non-replicating beneficial bacteria for AD treatment.     | [58] | 2017 |
|                                            | <i>V. filiformis</i><br>(biomass)                                                                                                                                                                                           | Clinical trial<br>(aged from 6<br>months to 63 years)        | Moderate form of AD /<br>Topical                                                                 | <ul style="list-style-type: none"> <li>• Treatment with a lipophilic cream containing a biomass of <i>V. filiformis</i> <ul style="list-style-type: none"> <li>○ Improvement in SCORAD</li> <li>○ Increased level of <i>Xanthomonas</i> genus</li> </ul> </li> <li>• Stable level of <i>Staphylococcus</i> genus.</li> </ul> | The ability to normalise skin microbiota and a reduction in the number and severity of flare-ups was demonstrated.                               | [59] | 2017 |
|                                            | <i>H. influenzae</i> ,<br><i>S. pneumoniae</i> ,<br><i>K. ozaenae</i><br><i>K. pneumoniae</i> ,<br><i>S. aureus</i> ,<br><i>S. viridans</i> ,<br><i>S. pyrogenes</i> ,<br><i>N. catarrhalis</i><br>(OM-85 bacterial lysate) | Clinical trial<br>(Children)                                 | mild to severe /<br>Oral                                                                         | <ul style="list-style-type: none"> <li>• Occurrence of new flares was reduced and/or delayed;</li> <li>• no major side effect observed together;</li> <li>• good tolerability.</li> </ul>                                                                                                                                    | Clinical efficacy and long-term tolerability of an oral bacterial extract, as adjuvant therapy in children with established AD was demonstrated. | [60] | 2017 |

|                                           |                                                 |                                                        |                                                       |                                                                                                                                                                                                                                                                                                                                                                                                               |                                                                                                                                                                                                                                                    |      |      |
|-------------------------------------------|-------------------------------------------------|--------------------------------------------------------|-------------------------------------------------------|---------------------------------------------------------------------------------------------------------------------------------------------------------------------------------------------------------------------------------------------------------------------------------------------------------------------------------------------------------------------------------------------------------------|----------------------------------------------------------------------------------------------------------------------------------------------------------------------------------------------------------------------------------------------------|------|------|
| HEAT-KILLED OR INACTIVATED MICROORGANISMS | <i>L. plantarum</i> KCTC 10887BP (lysate)       | NC/Nga mice back skin                                  | Skin sensitisation/<br>Oral                           | <ul style="list-style-type: none"> <li>Horny layer formation attenuation;</li> <li>reduction of epidermal thickening;</li> <li>increase in epidermal permeability barrier function;</li> <li>reduced spontaneous scratching behaviour.</li> </ul>                                                                                                                                                             | Host homeostasis improvement and utilisation for the clinical treatment of inflammatory diseases.                                                                                                                                                  | [61] | 2015 |
|                                           | <i>L. plantarum</i> K8 (lysate)                 | SKH-1 hairless female mice and Clinical trial (Adults) | Mice skin sensitisation and Healthy Volunteers / Oral | <ul style="list-style-type: none"> <li>Mouse model: <ul style="list-style-type: none"> <li>attenuation in horny layer formation</li> <li>decreased epidermal thickening</li> <li>increase in epidermal permeability</li> <li>reduced damage to barrier function</li> </ul> </li> <li>Clinical study: <ul style="list-style-type: none"> <li>improvement in barrier repair and function</li> </ul> </li> </ul> | The alleviation of AD lesions in the mouse model indicates that <i>L. plantarum</i> K8 lysates have a moisturising effect. Clinical trial results showed increased hydration, less water loss, and decreased horny layers on the face and forearm. | [62] | 2015 |
|                                           | <i>E. coli</i> and <i>E. faecalis</i> (Symbio®) | Clinical trial (Children)                              | Subjects at severe risk of atopy                      | <ul style="list-style-type: none"> <li>Reduction of AD;</li> <li>no effect on food sensitisation was demonstrated.</li> </ul>                                                                                                                                                                                                                                                                                 | An immune modulation in terms of prevention of AD in infancy was demonstrated by feeding bacterial lysates early in life.                                                                                                                          | [63] | 2014 |

**Table S1 Restoration of healthy skin microbiota (Continued. C) Microorganism-derivate substances**

|                                   |                                                                                           |                                            |                                                      |                                                                                                                                                                                                                                                                                                     |                                                                                                                                                                                                                            |       |      |
|-----------------------------------|-------------------------------------------------------------------------------------------|--------------------------------------------|------------------------------------------------------|-----------------------------------------------------------------------------------------------------------------------------------------------------------------------------------------------------------------------------------------------------------------------------------------------------|----------------------------------------------------------------------------------------------------------------------------------------------------------------------------------------------------------------------------|-------|------|
| MICROORGANISM-DERIVATE SUBSTANCES | <i>S. epidermidis</i><br>ATCC12228<br>(cytoplasmic bacteriocin compounds)                 | <i>In vitro</i>                            | antimicrobial activity and characterisation          | <ul style="list-style-type: none"> <li>selective antimicrobial activity against <i>S. aureus</i> MRSA,</li> <li>no active actions against <i>S. epidermidis</i>, <i>E. coli</i>, and <i>Salmonella Typhimurium</i>.</li> </ul>                                                                      | Promising <i>S. aureus</i> growth inhibition agent with a great potential for topical AD treatment.                                                                                                                        | [68]  | 2020 |
|                                   | <i>L. paracasei</i><br>IJH-SONE68<br>(esopolysaccharides)                                 | BALB/cAJcl mice                            | PiCl-Induced Delayed-Type Allergy Mouse Model / Oral | <ul style="list-style-type: none"> <li>Inhibition of the catalytic activity of hyaluronidase;</li> <li>overexpression of ear interleukin-4 (T2 helper cytokine);</li> <li>increase in serum immunoglobulin E.</li> </ul>                                                                            | Reduction in the ear swelling in mice. Improvement in type I and IV allergies as well as AD.                                                                                                                               | [69]  | 2019 |
|                                   | <i>Malassezia globosa</i><br>CBS7966<br>(secreted protease)                               | <i>In vivo</i> and <i>in vitro</i> studies | Skin Sampling and Protease characterisation          | <ul style="list-style-type: none"> <li>The protease is expressed on Human Facial Skin;</li> <li><i>S. aureus</i> biofilm disruption by hydrolysing <i>S. aureus</i> protein A.</li> </ul>                                                                                                           | Definition of the role of <i>Malassezia</i> and its enzymes for human skin health.                                                                                                                                         | [70]. | 2018 |
|                                   | <i>C. granulosum</i><br>(Bacterial cell wall fragment P40 conjugated with jaluronic acid) | Female mice                                | Oxazolone-induced contact AD / Topical               | <ul style="list-style-type: none"> <li>Reduction in ear thickness and weight together with oedema;</li> <li>anti-inflammatory effects confirmed by histological analysis;</li> <li>leukocyte recruitment.</li> </ul>                                                                                | The use of this cream may potentially alleviate the symptoms of and/or treat irritant contact dermatitis,                                                                                                                  | [71]  | 2017 |
|                                   | <i>Streptomices narvonensis</i> subsp. <i>Josamyceticus</i><br>(bacteriocins)             | NC/Nga Mice                                | Induction of AD-Like Skin Lesions / Topical          | <ul style="list-style-type: none"> <li>Improvement in SCORAD;</li> <li>decrease in the density of cellular infiltration into the dermis and the serum IgE level;</li> <li>reduced the expression of IFN-<math>\gamma</math> and IL-4 in auricular lymph node cells and the skin lesions.</li> </ul> | Topical application of josamycin to AD lesions colonised by <i>S. aureus</i> would be beneficial for control of AD by acting on superficially located <i>S. aureus</i> and inhibiting the development of Th1 and Th2 cells | [72]  | 2017 |

|                                   |                                                  |                 |                                                                                                                |                                                                                                                                                                                                                                                        |                                                                                         |      |      |
|-----------------------------------|--------------------------------------------------|-----------------|----------------------------------------------------------------------------------------------------------------|--------------------------------------------------------------------------------------------------------------------------------------------------------------------------------------------------------------------------------------------------------|-----------------------------------------------------------------------------------------|------|------|
| MICROORGANISM-DERIVATE SUBSTANCES | <i>S. lugdunensis</i><br>IVK28<br>(bacteriocins) | <i>In vitro</i> | Antimicrobial activity and characterisation                                                                    | <ul style="list-style-type: none"> <li>• novel thiazolidine-containing cyclic peptide antibiotic that prohibits colonisation by <i>S. aureus</i>;</li> <li>• non-ribosomally synthesised bioactive compound from human-associated bacteria.</li> </ul> | Human microbiota should be considered as a source for new antibiotics.                  | [73] | 2016 |
|                                   | <i>L. casei</i><br>KCTC 12398BP<br>(P14 protein) | NC/Nga mice     | AD induced by cream prepared from house dust mites and a crude extract allergen of <i>D. farinae</i> / Topical | <ul style="list-style-type: none"> <li>• Down regulation of serum IgE and interleukin-4;</li> <li>• improvement in SCORAD and scratching score.</li> </ul>                                                                                             | Potential therapeutic effects and use as immunomodulatory agent for clinical treatment. | [74] | 2015 |

**Table S1 Restoration of healthy skin microbiota (Continued. D) Microbiome transplantation**

|                            |                                                         |                                        |                                          |                                                                                                                                                                                                            |                                                                                                                                                          |      |      |
|----------------------------|---------------------------------------------------------|----------------------------------------|------------------------------------------|------------------------------------------------------------------------------------------------------------------------------------------------------------------------------------------------------------|----------------------------------------------------------------------------------------------------------------------------------------------------------|------|------|
| MICROBIOME TRANSPLANTATION | Skin microbiota communities                             | Pilot study (Adults)                   | Healthy volunteers / Complete transplant | <ul style="list-style-type: none"> <li>Evidence of transfer of a partial DNA signature were demonstrated.</li> </ul>                                                                                       | Unenriched transfer of whole cutaneous microbiota, despite the challenges, is worthy of further investigation to restore the dysbiosis that occurs in AD | [76] | 2019 |
|                            | <i>R. mucosa</i><br>ATCC BAA-692                        | Clinical trial (Adults and paediatric) | AD diagnosis / Allogeneic transplant     | <ul style="list-style-type: none"> <li>Improvement in SCORAD;</li> <li>decrease of pruritus, topical corticosteroid use and <i>S. aureus</i> colonisation;</li> <li>no adverse events reported.</li> </ul> | These early results support continued evaluation of <i>R. mucosa</i> therapy with a placebo-controlled trial.                                            | [77] | 2018 |
|                            | <i>Staphylococcus hominis</i> and <i>S. epidermidis</i> | Clinical trial (Adults)                | AD diagnosis / Autologous transplant     | <ul style="list-style-type: none"> <li>Decreased <i>S. aureus</i> colonisation was observed at the autologous microbiome transplant site compared to the vehicle-treated contralateral forearm.</li> </ul> | A single application was sufficient to exert antimicrobial action.                                                                                       | [19] | 2017 |

**Table S2 Drug Delivery System (DDS) for AD treatment. A) Nanoparticles (NPs)**

|               | Vehicle and compound                                                                        | Methodology and model                                                                                                                          | Target/Characterisation                                                                                                                 | Results                                                                                                                                                                                                                                                                | Conclusion                                                                                                         | Ref. | Year |
|---------------|---------------------------------------------------------------------------------------------|------------------------------------------------------------------------------------------------------------------------------------------------|-----------------------------------------------------------------------------------------------------------------------------------------|------------------------------------------------------------------------------------------------------------------------------------------------------------------------------------------------------------------------------------------------------------------------|--------------------------------------------------------------------------------------------------------------------|------|------|
| NANOPARTICLES | Betamethasone valerate (BMV) nanoencapsulate into the chitosan nanoparticles (CS-NPs)       | <i>In vitro</i> formulation and characterisation<br><i>Ex-vivo</i> with Wistar albino rat skin                                                 | <ul style="list-style-type: none"> <li>• Drug permeation studies</li> <li>• retention into various skin layers</li> </ul>               | <ul style="list-style-type: none"> <li>• Facilitated drug penetration across the <i>stratum corneum</i></li> <li>• higher drug retention into various skin layers (epidermis and dermis)</li> </ul>                                                                    | Increased localised targeting and improved therapeutic efficacy for treatment of AD.                               | [88] | 2019 |
|               | Tacrolimus-loaded thermosensitive solid lipid nanoparticles (SLN)                           | <i>In vitro</i> formulation and characterisation<br><i>Ex vivo</i> Sprague Dawley rat dorsal skin and <i>in vivo</i> New Zealand white rabbits | <ul style="list-style-type: none"> <li>• Skin penetration tests</li> </ul>                                                              | <ul style="list-style-type: none"> <li>• Penetration to a deeper layer than the reference product;</li> <li>• Delivering more drug into deeper skin layers than the controls.</li> </ul>                                                                               | Potential application for the delivery of difficult-to-permeate, poorly water-soluble drugs into deep skin layers. | [89] | 2019 |
|               | Hyaluronic acid-modified betamethasone encapsulated polymeric nanoparticles (HA-BMV-CS-NPs) | <i>In vitro</i> formulation and characterisation<br><i>ex vivo</i> (Wistar albino rat skin)                                                    | <ul style="list-style-type: none"> <li>• Physicochemical characteristics</li> <li>• Release study</li> <li>• Drug permeation</li> </ul> | <ul style="list-style-type: none"> <li>• <i>In vitro</i> release study displayed Fickian diffusion-type mechanism of release in simulated skin surface</li> <li>• Higher amount of drug retained in the epidermis and the dermis compared to compound alone</li> </ul> | Efficient dermal targeting of betamethasone and improved anti-AD efficacy.                                         | [90] | 2019 |

|                                                                                                     |                                                                                                            |                                                                                                                   |                                                                                                                                                                                      |                                                                                                                                                                  |      |
|-----------------------------------------------------------------------------------------------------|------------------------------------------------------------------------------------------------------------|-------------------------------------------------------------------------------------------------------------------|--------------------------------------------------------------------------------------------------------------------------------------------------------------------------------------|------------------------------------------------------------------------------------------------------------------------------------------------------------------|------|
| Hydrocortisone<br>hydroxytyrosol anti-oxidant-<br>loaded chitosan<br>nanoparticles<br>(HA-HT-CSNPs) | <i>In vivo</i><br>Human adult healthy female                                                               | <ul style="list-style-type: none"> <li>• Systemic toxicity</li> </ul>                                             | <ul style="list-style-type: none"> <li>• Not significant differences in parameters level indicating non systemic toxicity</li> </ul>                                                 | Safe, well-tolerated, and non-toxic, which may be useful in treating AD. [91]                                                                                    | 2019 |
| Tacrolimus nanoparticles<br>based on chitosan combined<br>with nicotinamide (FK506-<br>NIC-CS-NPs)  | <i>In vitro</i> formulation and characterisation<br><i>In vivo</i> BABL/c mice<br>(induced skin lesion)    | <ul style="list-style-type: none"> <li>• Skin permeation studies</li> </ul>                                       | <ul style="list-style-type: none"> <li>• Enhanced permeation through and into the skin,</li> <li>• Efficacy on clinical symptoms</li> </ul>                                          | The system enhances the permeability and plays an adjuvant role in anti-AD by reducing the dose of active principle. [92]                                        | 2018 |
| Betamethasone Valerate<br>incorporate in lipid carriers                                             | <i>In vitro</i> formulation and characterisation<br><i>Ex vivo</i> and preclinical testing                 | <ul style="list-style-type: none"> <li>• Permeation studies</li> <li>• Anti-inflammatory testing</li> </ul>       | <ul style="list-style-type: none"> <li>• Enhancement permeation ratio compared to plain gel.</li> <li>• Significant extended anti-inflammatory effect</li> </ul>                     | The developed formulation is efficient in a once a day dose in therapy for AD. [93]                                                                              | 2018 |
| Hyaluronic acid (HA)<br>decorated tacrolimus-loaded<br>nanoparticles (TCS-CS-NPs)                   | <i>In vitro</i> formulation and characterisation<br><i>Ex vivo</i> and <i>in vivo</i><br>NC/Nga mice skin  | <ul style="list-style-type: none"> <li>• Drug permeation</li> <li>• Evaluation of therapeutic efficacy</li> </ul> | <ul style="list-style-type: none"> <li>• Sustained release pattern</li> <li>• Efficient dermal targeting</li> <li>• Improved therapeutic efficacy</li> </ul>                         | This formula may be a promising therapeutic approach for rationalised management of AD, particularly in children as well as in adults with steroid phobia. [94]  | 2018 |
| Dendritic Core-Multishell<br>Nanocarriers (CMS)                                                     | <i>In vitro</i> formulation and characterisation<br><i>in vivo</i> SKH-1 mice<br>(AD induced by oxazolone) | <ul style="list-style-type: none"> <li>• Topical Application</li> <li>• Subcutaneous Injection</li> </ul>         | <ul style="list-style-type: none"> <li>• Topical Application accumulate in the <i>Stratum Corneum</i> only</li> <li>• Biocompatibility</li> <li>• No evidence of toxicity</li> </ul> | Suitable candidates for drugs encapsulation targeting stratum corneal without carrier penetration and thus without biological effects by the carrier itself [95] | 2017 |

|                     |                                                                                                           |                                                                                                                                           |                                                                                                                                       |                                                                                                                                                                                                                                                                                             |                                                                                                                                        |      |      |
|---------------------|-----------------------------------------------------------------------------------------------------------|-------------------------------------------------------------------------------------------------------------------------------------------|---------------------------------------------------------------------------------------------------------------------------------------|---------------------------------------------------------------------------------------------------------------------------------------------------------------------------------------------------------------------------------------------------------------------------------------------|----------------------------------------------------------------------------------------------------------------------------------------|------|------|
| NANOPARTICLES (NPs) | Cationic polymeric chitosan nanoparticles (CSNPs) loaded with hydrocortisone (HC) and hydroxytyrosol (HT) | <i>In vitro</i> formulation and characterisation and antimicrobial activity<br><i>In vivo</i> Albino Wistar rats                          | <ul style="list-style-type: none"> <li>Sub-chronic dermal toxicity</li> </ul>                                                         | <ul style="list-style-type: none"> <li>Significant target delivery</li> <li>Lower systemic drug absorption than the commercial formulation</li> <li>Improved drug accumulation and bioavailability</li> </ul>                                                                               | Beneficial and safe for patients with AD                                                                                               | [96] | 2016 |
|                     | Nanocarrier-based transcutaneous co-delivery of hydrocortisone (HC) and hydroxytyrosol (HT)               | <i>In vitro</i> formulation and characterisation<br><i>In vivo</i> NC/Nga mice (AD lesion induced by 1-chloro-2, 4-dinitrobenzene) (DNCB) | <ul style="list-style-type: none"> <li>Clinical efficacy</li> <li>Immunological studies</li> <li>Histological examinations</li> </ul> | <ul style="list-style-type: none"> <li>Improve SCORAD</li> <li>Decrease in IgE and PGE<sub>2</sub> expression</li> <li>Reduced histamine and VEGF-<math>\alpha</math> levels in serum and skin homogenates</li> <li>Inhibition of inflammatory cell chemotaxis and infiltration.</li> </ul> | Alternative therapeutic approach in the management of dermatosis.                                                                      | [97] | 2014 |
|                     | Silver-nanolipid complex (sNLC)                                                                           | <i>In vitro</i> formulation, characterisation and antimicrobial activity<br><i>In vivo</i> BALB/c mice<br>murine animal (model of AD)     | <ul style="list-style-type: none"> <li>Anti-inflammatory activity evaluation</li> </ul>                                               | <ul style="list-style-type: none"> <li>High adhesivity to skin and bacterial surfaces,</li> <li>Locally high concentrations of silver ion killing the bacteria</li> <li>Restoration of the distorted skin barrier, much more effective than silver alone</li> </ul>                         | NLC incorporation makes the drugs more effective (penetration enhancement) and simultaneously exploits the skin normalisation ability. | [16] | 2014 |

|               |                                              |                                                                                                                                                 |                                                                                                                                                                                                                       |                                                                                                                                                                                                                                             |                                                                |
|---------------|----------------------------------------------|-------------------------------------------------------------------------------------------------------------------------------------------------|-----------------------------------------------------------------------------------------------------------------------------------------------------------------------------------------------------------------------|---------------------------------------------------------------------------------------------------------------------------------------------------------------------------------------------------------------------------------------------|----------------------------------------------------------------|
| NANOPARTICLES |                                              |                                                                                                                                                 |                                                                                                                                                                                                                       | <ul style="list-style-type: none"> <li>• Improvement in SCORAD</li> <li>• Decrease in IgE and PGE<sub>2</sub> expression</li> </ul>                                                                                                         |                                                                |
|               | Hydrocortisone-loaded chitosan nanoparticles | <i>In vitro</i> formulation and characterisation<br><i>in vivo</i><br>NC/Nga mice<br>(AD lesion induced by 1-chloro-2, 4-dinitrobenzene) (DNCB) | <ul style="list-style-type: none"> <li>• Evaluation of dermatitis severity</li> <li>• Relative expression of IgE, histamine, PGE<sub>2</sub> and VEGF-<math>\alpha</math></li> <li>• Procarta® immunoassay</li> </ul> | <ul style="list-style-type: none"> <li>• Reduced histamine and VEGF-<math>\alpha</math> levels in serum and skin homogenates</li> <li>• Inhibition of inflammatory cell chemotaxis and infiltration at the site of inflammation.</li> </ul> | Effective therapeutic approach to manage dermatitis. [98] 2014 |

**Table S2 DDS for AD treatment (Continued. B) Liposomes, ethosomes and vesicles**

|                                   |                                                            |                                                                                                                                          |                                                                                                                                                |                                                                                                                                                         |                                                                                                                                                          |       |      |
|-----------------------------------|------------------------------------------------------------|------------------------------------------------------------------------------------------------------------------------------------------|------------------------------------------------------------------------------------------------------------------------------------------------|---------------------------------------------------------------------------------------------------------------------------------------------------------|----------------------------------------------------------------------------------------------------------------------------------------------------------|-------|------|
| LIPOSOMES, ETHOSOMES AND VESICLES | Ultra-flexible lipid vesicles to deliver Cyclosporin (CyA) | <i>In vitro</i> formulation and characterisation<br>Franz diffusion cell<br>(human heat-separated epidermis)                             | <ul style="list-style-type: none"> <li>Absorption study</li> </ul>                                                                             | <ul style="list-style-type: none"> <li>Formulations facilitated CyA permeation through the epidermis</li> </ul>                                         | Topical delivery of CyA is possible using the formulations designed as an alternative to the current oral or parenteral routes                           | [102] | 2019 |
|                                   | $\beta$ - cycloethosomes with Fluocinolone acetonide (FA)  | <i>In vitro</i> formulation and characterisation<br><i>Ex vivo</i><br>Albino Wistar rat skin                                             | <ul style="list-style-type: none"> <li>Skin permeability</li> </ul>                                                                            | <ul style="list-style-type: none"> <li>Able to reach the required target flux without the help of an additional penetration enhancer</li> </ul>         | Stable and efficient vesicular carrier for topical delivery with higher entrapment efficiency and stability than reference vesicles.                     | [103] | 2018 |
|                                   | Liposomal polyvinylpyrrolidone-iodine hydrogel             | Clinical trial<br>(Adults)                                                                                                               | <ul style="list-style-type: none"> <li>Several skin conditions including AD</li> </ul>                                                         | <ul style="list-style-type: none"> <li>Well tolerated formulation and led to improvements in pain, quality of life, eczema area and severity</li> </ul> | Potential use as an effective treatment for inflammatory skin conditions associated with bacterial colonisation.                                         | [104] | 2017 |
|                                   | Nanoethosomal glycolic vesicles of triamcinolone acetonide | <i>In vitro</i> formulation and characterisation<br><i>Ex vivo</i><br>Franz diffusion cell<br>(Wistar rat skin)                          | <ul style="list-style-type: none"> <li>Skin permeability</li> </ul>                                                                            | <ul style="list-style-type: none"> <li>High permeation</li> <li>Non-irritant potential</li> </ul>                                                       | Stable and efficient carrier for enhanced topical delivery that exhibited higher entrapment efficiency, and stability than reference ethosomal vesicles. | [105] | 2017 |
|                                   | Ethosomes-based topical delivery system of cetirizine      | <i>In vitro</i> formulation and characterisation<br><i>In vivo</i> and <i>Ex vivo</i><br>BALB/c mice<br>(AD lesion induced by oxazolone) | <ul style="list-style-type: none"> <li>Skin permeation and deposition</li> <li>Skin sensitivity</li> <li>Pharmacodynamic evaluation</li> </ul> | <ul style="list-style-type: none"> <li>Reduction in scratching score, erythema score, skin hyperplasia and dermal eosinophil count</li> </ul>           | Formulation of effective carriers for dermal delivery of antihistaminic drug, cetirizine, for the treatment of AD.                                       | [106] | 2014 |
|                                   | Levocetirizine based on flexible vesicles (FVs)            | <i>In vitro</i> formulation and characterisation<br><i>In vivo</i> and <i>Ex vivo</i><br>BALB/c mice<br>(AD lesion induced by oxazolone) | <ul style="list-style-type: none"> <li>Skin permeation and deposition</li> <li>Pharmacodynamic evaluation</li> </ul>                           | <ul style="list-style-type: none"> <li>Reduction in scratching score, erythema score, as well as dermal eosinophil count.</li> </ul>                    | A novel FV based topical formulation developed for treatment of AD.                                                                                      | [107] | 2014 |
